# Supplementary material for: Genomic divergence between Dickeya zeae strain EC2 isolated from rice and previously identified strains, suggests a different rice foot rot strain
Source: PubMed Central journal article supplement (PMC7575072; doi:10.1371/journal.pone.0240908), 2020-10-20

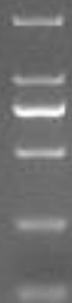

EC1

MS1

EC2

EC2

N

EC1

MS1

EC2

EC2

N

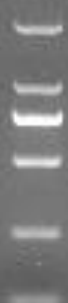

EC1

MS1

EC2

EC2

N

EC1

MS1

EC2

EC2

N

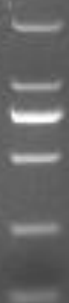

M EC1 MS1 EC2 EC2 N EC1 MS1 EC2 EC2 N M EC1 MS1 EC2 EC2 N EC1 MS1 EC2 EC2 N M

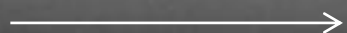

*hrpY*

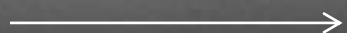

*hrpS*

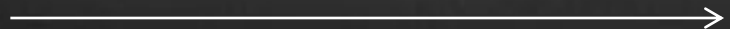

Annealing temp. 56 °C

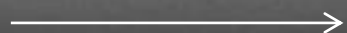

*hrpY*

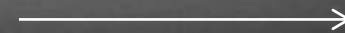

*hrpS*

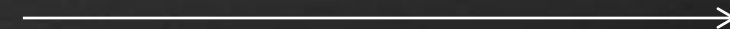

Annealing temp. 58 °C

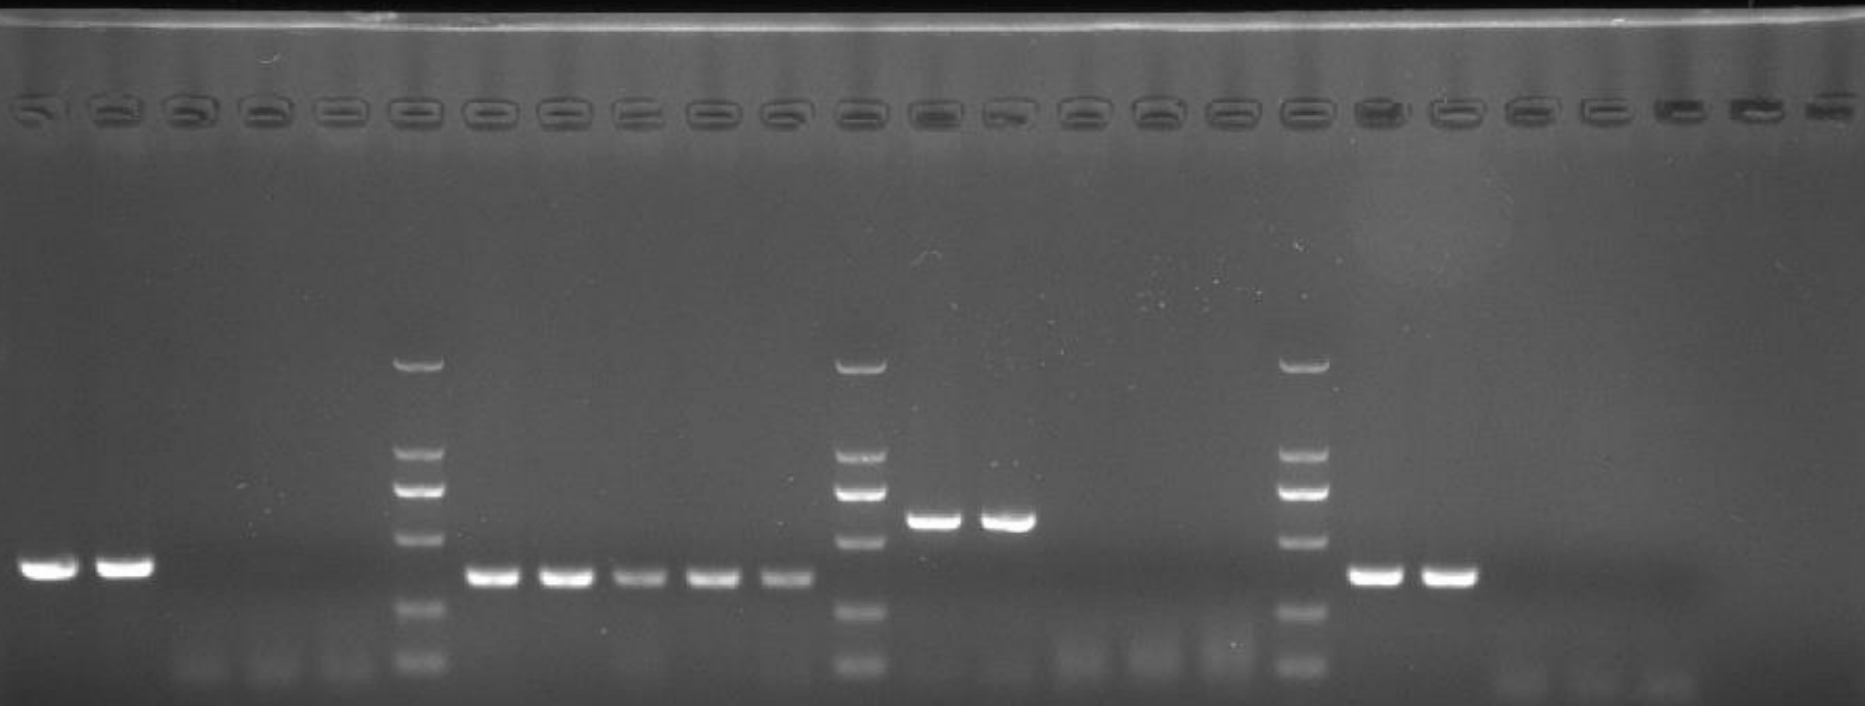

EC1 MS1 EC2 EC2 N M

→

*hrpL*

M EC1 MS1 EC2 EC2 N M EC1 MS1 EC2 EC2 N

→

*virB4*

→

*virB11*

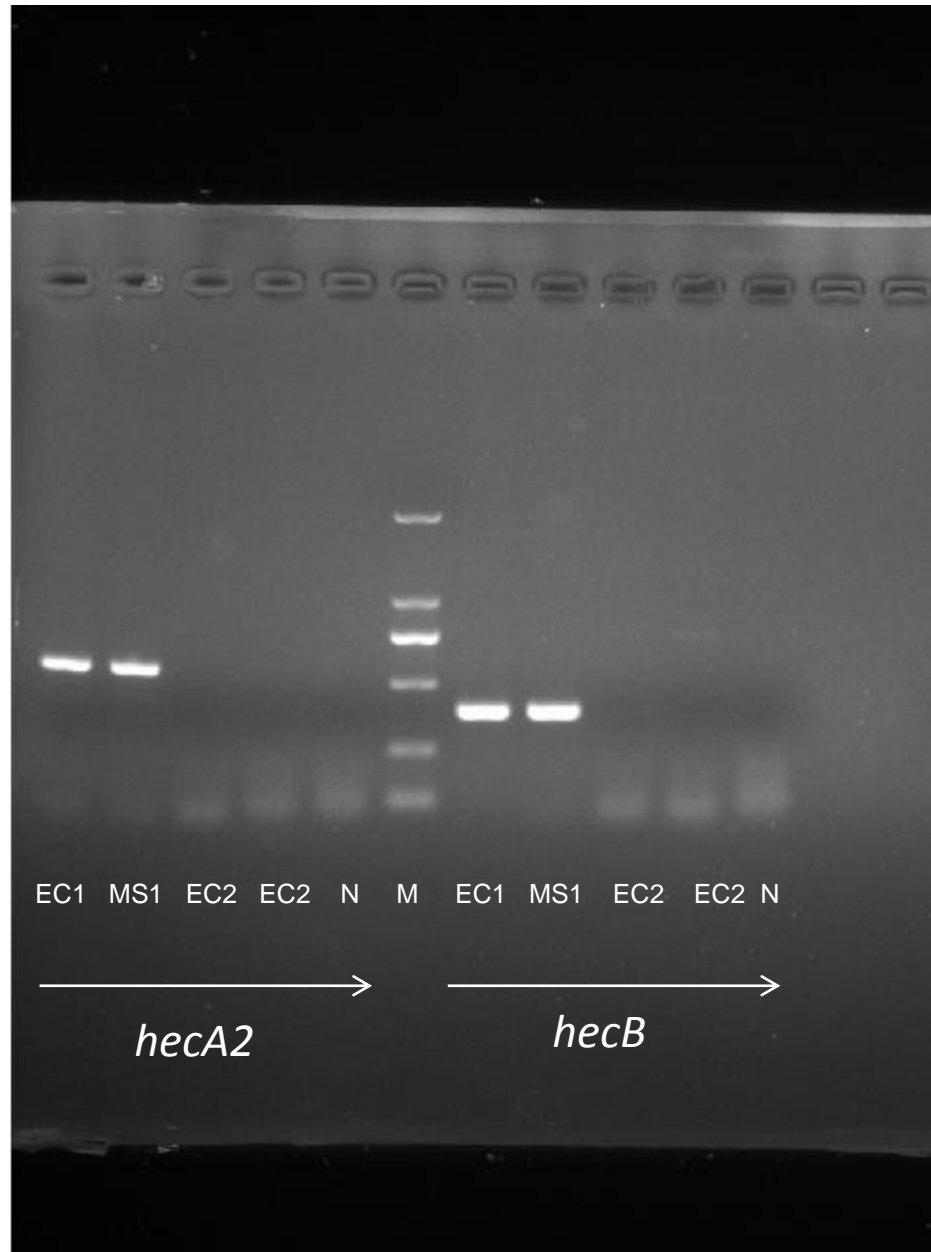

Supplement: pone.0240908.s007.pdf [file pone.0240908.s007.pdf]
